# Supplementary material
Source: publisher figshare collection journal article supplement (https://sage.figshare.com/ndownloader/files/14617283)
Supplement: Supplementary file 1 [file 14617283]

**Table A: Operationalization and Source of Variables**

| <b>Variable</b>             | <b>Operationalization</b>                                                                                                                                                                                                                                                                                                                                                                                                                                 | <b>Source</b>                               |
|-----------------------------|-----------------------------------------------------------------------------------------------------------------------------------------------------------------------------------------------------------------------------------------------------------------------------------------------------------------------------------------------------------------------------------------------------------------------------------------------------------|---------------------------------------------|
| <b>INDIVIDUAL VARIABLES</b> |                                                                                                                                                                                                                                                                                                                                                                                                                                                           |                                             |
| Political consumerism       | 0 = Never joined in boycotts in the last year<br>1= Joining in boycotts at least one time last year                                                                                                                                                                                                                                                                                                                                                       | World Values Survey<br>2010-2014<br><br>V91 |
| Political trust             | Respondent's confidence the government (national level):<br>0= not very much confidence" or "none at all"<br>1= "a great deal of confidence" or "quite a lot of confidence"                                                                                                                                                                                                                                                                               | V115                                        |
| Age                         | In years                                                                                                                                                                                                                                                                                                                                                                                                                                                  | V242                                        |
| Sex                         | 0 = female<br>1 = male                                                                                                                                                                                                                                                                                                                                                                                                                                    | V240                                        |
| Education                   | 1 = No formal education<br>2 = Incomplete primary school<br>3 = Complete primary school<br>4 = Incomplete secondary school: technical/ vocational type<br>5 = Complete secondary school: technical/ vocational type<br>6 = Incomplete secondary school: university-preparatory type<br>7 = Complete secondary school: university-preparatory type<br>8 = Some university-level education, without degree<br>9 = University - level education, with degree | V248                                        |
| Income                      | Income scale from 0 to 10<br>0 = lowest income group<br>10 = highest income group                                                                                                                                                                                                                                                                                                                                                                         | V239                                        |
| Political interest          | 1 = Not at all interested<br>2 = Not very interested                                                                                                                                                                                                                                                                                                                                                                                                      | V84                                         |

|                                   |                                                                                                                                                                                                       |                                                                                   |
|-----------------------------------|-------------------------------------------------------------------------------------------------------------------------------------------------------------------------------------------------------|-----------------------------------------------------------------------------------|
|                                   | 3 = Somewhat interested<br>4 = Very interested                                                                                                                                                        |                                                                                   |
| Vote                              | Voting at the national level<br>1 = always<br>2 = usually<br>3 = never                                                                                                                                | V227                                                                              |
| Active Party membership           | 0 = Inactive member or don't belong<br>1 = Active member                                                                                                                                              | V29                                                                               |
| Signing a petition                | 1 = at least once in the last year<br>0 = never                                                                                                                                                       | V90.                                                                              |
| Attending peaceful demonstrations | 1 = at least once in the last year<br>0 = never                                                                                                                                                       | V92                                                                               |
| Joining strikes                   | 1 = at least once in the last year<br>0 = never                                                                                                                                                       | V93                                                                               |
| Any other act of protest          | 1 = at least once in the last year<br>0 = never                                                                                                                                                       | V94                                                                               |
| Postmaterialism                   | 0 = materialist (mentioned exclusively materialist values)<br>1 = postmaterialist (mentioned exclusively postmaterialist values)<br>2 = mixed (mentioned both materialist and postmaterialist values) | V60 / V61                                                                         |
| <b>CONTEXTUAL VARIABLES</b>       |                                                                                                                                                                                                       |                                                                                   |
| Degree of democracy               | Combined Polity Score, range, -10 to +10, - 10 = strongly autocratic<br>+10 = strongly democratic                                                                                                     | POLITY IV PROJECT (Marshall et al., 2014)                                         |
| GDP                               | GDP per capita based on purchasing-power-parity (average 2005-2009), rescaled by /10'000.                                                                                                             | International monetary fund (IMF)                                                 |
| Income inequality                 | Gini-index different years, higher values indicating higher inequality                                                                                                                                | World Bank and CIA World-factbook                                                 |
| Globalization                     | KOF Globalization index 2010                                                                                                                                                                          | <a href="http://globalization.kof.ethz.ch/">http://globalization.kof.ethz.ch/</a> |
| Fair trade towns                  | Number of free trade towns per population before 2014 / rescaled by *10'000'000                                                                                                                       | <a href="http://www.fairtradetowns.org/">http://www.fairtradetowns.org/</a>       |

Table B: **Descriptive statistics**

|                             | <b>Observations</b> | <b>Mean</b> | <b>Std. Dev.</b> | <b>Min</b> | <b>Max</b> |
|-----------------------------|---------------------|-------------|------------------|------------|------------|
| INDIVIDUAL VARIABLES        |                     |             |                  |            |            |
| Political consumerism       | 68,628              | 0.04        | -                | 0          | 1          |
| Age                         | 68,918              | 42.16       | 16.65            | 16         | 99         |
| Gender                      | 68,907              | 0.48        | -                | 0          | 1          |
| Education                   | 68,196              | 5.69        | 2.39             | 1          | 9          |
| Income                      | 66,871              | 4.82        | 2.12             | 1          | 10         |
| Political interest          | 68,412              | 2.39        | 0.97             | 1          | 4          |
| vote                        | 67,426              | 1.59        | 0.77             | 1          | 3          |
| Active Party member         | 68,466              | 0.05        | -                | 0          | 1          |
| Took part in demonstra-     |                     |             |                  |            |            |
| tions                       | 68,489              | 0.09        | -                | 0          | 1          |
| Petition signed             | 68,440              | 0.14        | -                | 0          | 1          |
| Took part in other protests | 68,181              | 0.03        | -                | 0          | 1          |
| Political trust             | 66,648              | 0.45        | -                | 0          | 1          |
| Postmaterialism             | 65,673              | 1.36        | 0.90             | 0          | 2          |
| CONTEXT VARIABLES           |                     |             |                  |            |            |
| Degree of democracy         | 47                  | 5.74        | 4.99             | -7         | 10         |
| Fair trade town per popula- |                     |             |                  |            |            |
| tion (rescaled)             | 47                  | 3.05        | 13.18            | 0          | 76.13      |
| GDP per capita (rescaled)   | 47                  | 1.33        | 1.11             | 0.04       | 4.52       |
| Globalization               | 47                  | 64.12       | 12.11            | 39.76      | 88.22      |
| Gini index                  | 44                  | 37.58       | 9.38             | 16.60      | 63.38      |

**Table C: Political Trust and Political Consumerism - Hierarchical Logistic Regression**

|                             | <b>Model 1</b> |        | <b>Model 2</b> |        |
|-----------------------------|----------------|--------|----------------|--------|
|                             | Coef.          | SE     | Coef.          | SE     |
| Constant                    | -5.402         | (0.23) | -5.300         | (0.23) |
| INDIVIDUAL LEVEL            |                |        |                |        |
| Age                         | -0.008         | (0.00) | -0.008         | (0.00) |
| Gender                      | 0.092          | (0.05) | 0.092          | (0.05) |
| Education                   | 0.075          | (0.01) | 0.075          | (0.01) |
| Income                      | 0.000          | (0.01) | 0.000          | (0.01) |
| Political interest          | 0.343          | (0.03) | 0.342          | (0.03) |
| Vote (ref.: always vote)    |                |        |                |        |
| usually                     | -0.026         | (0.06) | -0.027         | (0.06) |
| never                       | -0.208         | (0.08) | -0.208         | (0.08) |
| Active party member         | 0.149          | (0.08) | 0.150          | (0.08) |
| Took part in demonstrations | 1.775          | (0.05) | 1.776          | (0.05) |
| Petition signed             | 1.489          | (0.06) | 1.490          | (0.06) |
| Took part in other protests | 1.336          | (0.07) | 1.335          | (0.07) |
| Political trust             | -0.327         | (0.08) | -0.564         | (0.12) |
| CONTEXTUAL LEVEL            |                |        |                |        |
| Degree of democracy         | -0.016         | (0.03) | -0.030         | (0.03) |
| Fair trade towns            | 0.012          | (0.01) | 0.012          | (0.01) |
| Degree of democracy *       |                |        |                |        |
| Political trust             |                |        | 0.039          | (0.02) |
| VARIANCE OF RANDOM EFFECTS  |                |        |                |        |
| Political trust             | 0.099          | (0.05) | 0.067          | (0.04) |
| Intercept                   | 0.586          | (0.14) | 0.579          | (0.14) |
| NUMBER OF CASES             |                |        |                |        |
| Countries                   | 47             |        | 47             |        |
| Individuals                 | 61503          |        | 61503          |        |

Table D: **Political Trust and Political Consumerism - Hierarchical Logistic Regression - Alternative Model Specifications**

|                                       | Model 3 |        | Model 4 |        | Model 5 |        | Model 6 |        |
|---------------------------------------|---------|--------|---------|--------|---------|--------|---------|--------|
|                                       | Coef.   | SE     | Coef.   | SE     | Coef.   | SE     | Coef.   | SE     |
| Constant                              | -5.056  | (0.24) | -5.480  | (0.24) | -6.394  | (1.08) | -5.889  | (0.72) |
| INDIVIDUAL LEVEL                      |         |        |         |        |         |        |         |        |
| Age                                   | -0.008  | (0.00) | -0.008  | (0.00) | -0.009  | (0.00) | -0.008  | (0.00) |
| Gender                                | 0.091   | (0.05) | 0.100   | (0.05) | 0.093   | (0.05) | 0.093   | (0.05) |
| Education                             | 0.076   | (0.01) | 0.074   | (0.01) | 0.071   | (0.01) | 0.075   | (0.01) |
| Income                                | 0.002   | (0.01) | -0.005  | (0.01) | 0.005   | (0.01) | 0.000   | (0.01) |
| Political interest                    | 0.341   | (0.03) | 0.344   | (0.03) | 0.354   | (0.03) | 0.343   | (0.03) |
| Vote (ref.: always vote)              |         |        |         |        |         |        |         |        |
| usually                               | -0.027  | (0.06) | -0.031  | (0.06) | -0.016  | (0.07) | -0.026  | (0.06) |
| never                                 | -0.211  | (0.08) | -0.229  | (0.08) | -0.170  | (0.09) | -0.208  | (0.08) |
| Active party member                   | 0.146   | (0.08) | 0.177   | (0.08) | 0.147   | (0.08) | 0.150   | (0.08) |
| Took part in demonstrations           | 1.771   | (0.05) | 1.781   | (0.06) | 1.744   | (0.06) | 1.777   | (0.05) |
| Petition signed                       | 1.492   | (0.06) | 1.478   | (0.06) | 1.477   | (0.06) | 1.488   | (0.06) |
| Took part in other protests           | 1.329   | (0.07) | 1.308   | (0.07) | 1.390   | (0.07) | 1.337   | (0.07) |
| Political trust (continuous)          | -0.200  | (0.04) |         |        |         |        |         |        |
| Political trust (dichotomous)         |         |        | -0.339  | (0.08) | -0.612  | (0.12) | -0.462  | (0.39) |
| Postmaterialism (ref.: materialist)   |         |        |         |        |         |        |         |        |
| postmaterialist                       |         |        | 0.300   | (0.10) |         |        |         |        |
| mixed                                 |         |        | 0.156   | (0.06) |         |        |         |        |
| CONTEXTUAL LEVEL                      |         |        |         |        |         |        |         |        |
| Degree of democracy                   | -0.023  | (0.03) | -0.017  | (0.03) | -0.052  | (0.03) | -0.026  | (0.03) |
| Fair trade towns                      | 0.011   | (0.01) | 0.011   | (0.01) | 0.010   | (0.01) | 0.009   | (0.01) |
| GDP per capita                        |         |        |         |        | -0.017  | (0.19) |         |        |
| Gini index                            |         |        |         |        | 0.006   | (0.01) |         |        |
| Globalization                         |         |        |         |        | 0.016   | (0.02) | 0.009   | (0.01) |
| Degree of democracy * Political trust |         |        |         |        | 0.047   | (0.02) |         |        |

|                                 |       |        |       |        |       |        |       |        |
|---------------------------------|-------|--------|-------|--------|-------|--------|-------|--------|
| Globalization * Political trust |       |        |       |        |       |        | 0.002 | (0.01) |
| VARIANCE OF RANDOM EFFECTS      |       |        |       |        |       |        |       |        |
| Political trust (continuous)    | 0.029 | (0.01) |       |        |       |        |       |        |
| Political trust (dichotomous)   |       |        | 0.102 | (0.05) | 0.058 | (0.04) | 0.100 | (0.05) |
| Intercept                       | 0.506 | (0.14) | 0.619 | (0.15) | 0.553 | (0.13) | 0.577 | (0.14) |
| NUMBER OF CASES                 |       |        |       |        |       |        |       |        |
| N                               | 47    |        | 47    |        | 44    |        | 47    |        |
| Individuals                     | 61503 |        | 59354 |        | 57893 |        | 61503 |        |

Table E: **Political Trust and Political Consumerism - Hierarchical logistic regression**

(10 multiply imputed data sets)

|                                       | Model 8 |        |
|---------------------------------------|---------|--------|
|                                       | Coef.   | SE     |
| Constant                              | -5.423  | (0.23) |
| INDIVIDUAL LEVEL                      |         |        |
| Age                                   | -0.007  | (0.00) |
| Gender                                | 0.082   | (0.05) |
| Education                             | 0.079   | (0.01) |
| Income                                | 0.002   | (0.01) |
| Political interest                    | 0.335   | (0.03) |
| Vote (ref.: always vote)              |         |        |
| usually                               | -0.003  | (0.06) |
| never                                 | -0.208  | (0.08) |
| Active party member                   | 0.150   | (0.08) |
| Took part in demonstrations           | 1.801   | (0.05) |
| Petition signed                       | 1.540   | (0.05) |
| Took part in other protests           | 1.358   | (0.06) |
| Political trust                       | -0.495  | (0.11) |
| CONTEXTUAL LEVEL                      |         |        |
| Degree of democracy                   | -0.026  | (0.02) |
| Degree of democracy * political trust | 0.030   | (0.01) |
| Fair trade towns                      | 0.012   | (0.01) |
| VARIANCES OF RANDOM EFFECTS           |         |        |
| Political trust                       | 0.230   | (0.07) |
| Intercept                             | 0.751   | (0.09) |
| NUMBER OF CASES                       |         |        |
| Countries                             | 47      |        |
| Individuals                           | 68918   |        |

Table F: **Political Trust and Political Consumerism – Hierarchical Logistic Regression without outliers**

|                                       | Model 8 |        |
|---------------------------------------|---------|--------|
|                                       | Coef.   | se     |
| Constant                              | -5.548  | (0.25) |
| INDIVIDUAL LEVEL                      |         |        |
| Age                                   | -0.009  | (0.00) |
| Gender                                | 0.051   | (0.05) |
| Education                             | 0.080   | (0.01) |
| Income                                | 0.021   | (0.01) |
| Political interest                    | 0.361   | (0.03) |
| Vote (ref.: always vote)              |         |        |
| usually                               | -0.016  | (0.07) |
| never                                 | -0.224  | (0.09) |
| Active party member                   | 0.132   | (0.09) |
| Took part in demonstrations           | 1.512   | (0.06) |
| Petition signed                       | 1.707   | (0.06) |
| Took part in other protests           | 1.350   | (0.07) |
| Political trust                       | -0.602  | (0.11) |
| CONTEXTUAL LEVEL                      |         |        |
| Degree of democracy                   | -0.015  | (0.03) |
| Degree of democracy * political trust | 0.038   | (0.01) |
| Fair trade towns                      | 0.012   | (0.01) |
| VARIANCES OF RANDOM EFFECTS           |         |        |
| Political trust                       | 0.00    | (0.00) |
| Intercept                             | 0.55    | (0.13) |
| NUMBER OF CASES                       |         |        |
| Countries                             | 44      |        |
| Individuals                           | 54905   |        |
